# Supplementary material
Source: PubMed Central journal article supplement (PMC3568597)
Supplement: AEM.02538-12_zam999104098so1.pdf [file AEM.02538-12_zam999104098so1.pdf]

1 **Supplemental Files for:**

2  
3 **Why orange Guaymas Basin *Beggiatoa* (*Maribeggiatoa*) are orange:**

4 **Single-filament genome-enabled identification of an abundant octaheme cytochrome**  
5 **with hydroxylamine oxidase, hydrazine oxidase, and nitrite reductase activities**

6  
7 Barbara J. MacGregor, Jennifer F. Biddle, Jason R. Siebert, Eric Staunton, Eric L. Hegg,  
8 Ann G. Matthyse, and Andreas Teske

9  
10  
11 <sup>1</sup>Department of Marine Sciences, University of North Carolina - Chapel Hill, Chapel Hill  
12 NC 27599

13 <sup>2</sup>College of Earth, Ocean, and the Environment, University of Delaware, Lewes DE  
14 19958

15 <sup>3</sup>Department of Biochemistry & Molecular Biology, Michigan State University, East  
16 Lansing MI 48824-1319

17 <sup>4</sup>Department of Environmental and Health Sciences, University of North Carolina -  
18 Chapel Hill, Chapel Hill NC 27599

19 <sup>5</sup>Department of Biology, University of North Carolina - Chapel Hill, Chapel Hill NC  
20 27599

21  
22 #To whom correspondence should be addressed: bmacgreg@unc.edu

23  
24  
25  
26

27

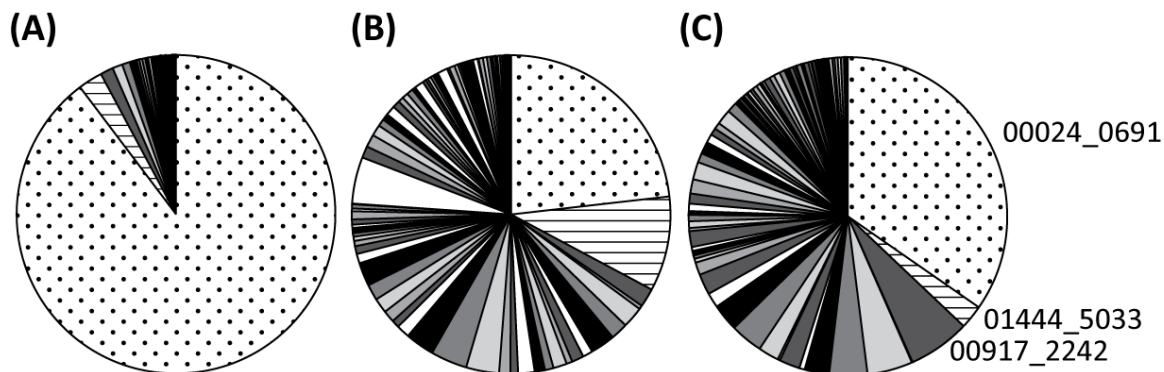

28  
29

30 **Figure S1. Identification of ORF encoding the orange protein by  $\mu$ LC/MS/MS. (A)**

31 **Sum of total ion currents per identified ORF (0.2% not assigned). (B) Average of total**

32 **ion currents for fragments assigned to each identified ORF (0.8% not assigned). (C)**

33 **Number of MS/MS spectra attributed to each identified ORF (total 1272, with 29 not**

34 **assigned)**

35

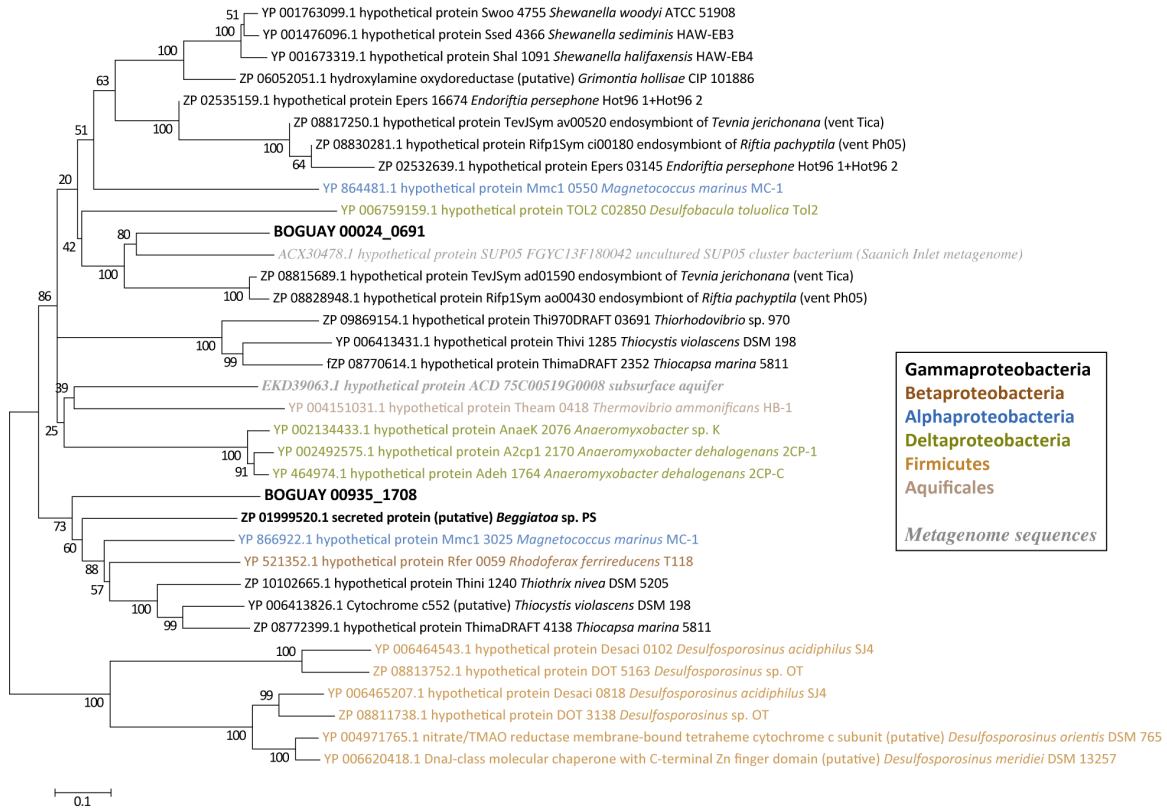

39 **Figure S2. Phylogenetic tree of inferred amino acid sequences of BOGUAY**  
 40 **00024\_0691 and BOGUAY 00935\_1708.** The first 100 BLASTP/nr hits for each  
 41 sequence (all but two of which were identical) were used to construct an initial tree,  
 42 which was then trimmed to show only closest relatives. Evolutionary analyses were  
 43 conducted in MEGA5 (4) with sequences aligned by MUSCLE (1). The evolutionary  
 44 history was inferred using the Neighbor-Joining method (3). The percentage of replicate  
 45 trees in which the associated taxa clustered together in the bootstrap test (500 replicates)  
 46 are shown next to the branches (2). The evolutionary distances were computed using the  
 47 Poisson correction method (5) and are in units of amino acid substitutions per site. All  
 48 ambiguous positions were removed for each sequence pair. The analysis involved 35  
 49 amino acid sequences, and 1132 positions were included in the final analysis.

50

51

52

53 **Table S1. NADPH-quinone oxidoreductase genes.**

54

| <b>Gene product</b> | <b>Complex</b>   | <b>Contig_ORF</b>      |
|---------------------|------------------|------------------------|
| NuoA                | Membrane complex | 00285_1243             |
| NuoB                | FeS protein      | 00285_1242, 00322_3116 |
| NuoC                | FeS protein      | 00285_1236, 00322_3117 |
| NuoD                | FeS protein      | 00285_1234, 00322_3119 |
| NuoE                | FMN              | 00285_1225             |
| NuoF                | FMN              | 00552_2594, 01153_1100 |
| NuoG                | FMN              | 00432_3220             |
| NuoH                | Membrane complex | 00432_3219, 00362_1731 |
| NuoI                | FeS protein      | 00432_3218             |
| NuoJ                | Membrane complex | 00432_3216             |
| NuoK                | Membrane complex | 00432_3215             |
| NuoL                | Membrane complex | 00543_4484             |
| NuoM                | Membrane complex | 01191_1496             |
| NuoN                | Membrane complex | 00024_0688             |

55

56

56

57 **SUPPLEMENTAL REFERENCES**

- 58 1. **Edgar, R. C.** 2004. MUSCLE: multiple sequence alignment with high accuracy  
59 and high throughput. *Nucleic Acids Research* **32**:1792-1797.
- 60 2. **Felsenstein, J.** 1985. Confidence limits on phylogenies: an approach using  
61 the bootstrap. *Evolution* **39**:783-791.
- 62 3. **Saitou, N., and M. Nei.** 1987. The neighbor-joining method: a new method  
63 for reconstructing phylogenetic trees. *Molecular Biology and Evolution*  
64 **4**:406-425.
- 65 4. **Tamura, K., D. Peterson, N. Peterson, G. Stecher, M. Nei, and S. Kumar.**  
66 2011. MEGA5: Molecular Evolutionary Genetics Analysis using maximum  
67 likelihood, evolutionary distance, and maximum parsimony methods.  
68 *Molecular Biology and Evolution* **28**:2731-2739.
- 69 5. **Zuckerandl, E., and L. Pauling.** 1965. Evolutionary convergence and  
70 divergence in proteins, p. 97-166. *In* V. Bryson and H. J. Vogel (ed.), *Evolving*  
71 *Genes and Proteins*. Academic Press, New York.
- 72
- 73
